# Supplementary material for: Construction of a layer-by-layer self-assembled rosemarinic acid delivery system on the surface of CFRPEEK implants for enhanced anti-inflammatory and osseointegration activities
Source: Royal Society of Chemistry journal article supplement (doi:10.1039/d3tb02599c), 2024-01-01
Supplement: d3tb02599c1.pdf [file d3tb02599c1.pdf]

## Supplementary Material

**Construction of a layer-by-layer self-assembly rosemary acid delivery system on the surface of CFRPEEK implants for enhanced anti-inflammatory and osseointegration activities**

**Shanshan Zhao<sup>1</sup>, Xingyu Zhou<sup>1</sup>, Junbo Dang<sup>1</sup>, Yilong Wang<sup>1</sup>, Junhui Jiang<sup>1</sup>, Tianhao Zhao<sup>2</sup>, Dahui Sun<sup>2</sup>, Chen Chen<sup>3</sup>, Xin Dai<sup>3</sup>, Yan Liu<sup>3</sup>, Mei Zhang<sup>1\*</sup>**

1. *Key Laboratory of High Performance Plastics, Ministry of Education, College of Chemistry, Jilin University, Changchun 130012, P. R. China;*

2. *Norman Bethune First Hospital, Jilin University, Changchun 130021, P. R. China*

3. *Jilin Province Guoda Bioengineering Co., Ltd, Changchun 130000, P. R. China*

*\*Corresponding author: [zhangmei@jlu.edu.cn](mailto:zhangmei@jlu.edu.cn)*

## Experimental methods of zeta potential and CCK-8 in the exploration of the optimal number of LBL layers for the surface modification

The zeta potential of SCPP/CC<sub>n</sub> (n = 1, 3, 5, 10, 15, or 20) was evaluated in a 0.001 M potassium chloride mobile electrolyte solution using the 35 × 15 × 1.5 mm<sup>3</sup> samples placed in an adjustable gap cell. HCl solution (0.1 M) and NaOH solution (0.1 M) were used to adjust the pH of the electrolyte to 5.0.

Cell Counting Kit-8 (CCK-8, Beyotime, China) was utilized for the cell proliferation assay. Cells were seeded on the surface of SCPP/CC<sub>n</sub> (n = 1, 3, 5, 10, 15, or 20) with 1 × 10<sup>4</sup> cells/well in 48-well plates. At the preset times (1, 4, and 7 days), cell medium was removed and 10% CCK-8 reagent contained in cell medium was added. After culturing at 37°C for 2 h, the OD value was determined at 450 nm.

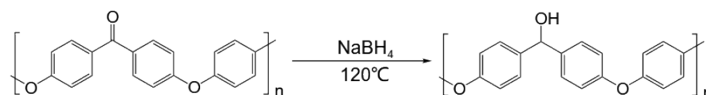

Fig.S1. The reduction reaction formula of SCP.

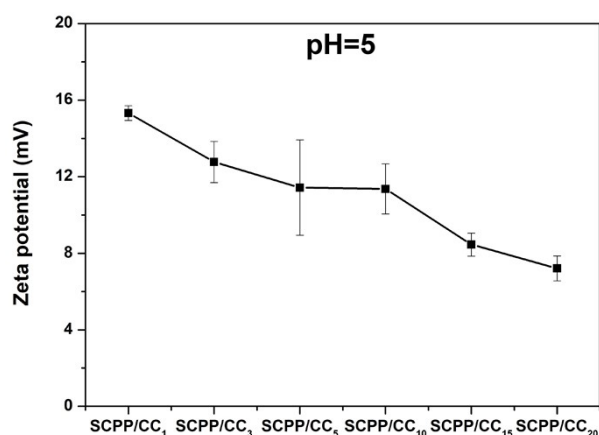

Fig.S2. Zeta potential of SCPP/CC<sub>n</sub> (n = 1, 3, 5, 10, 15, or 20).

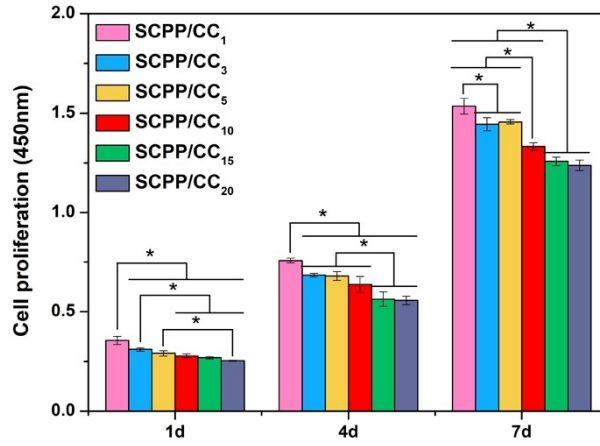

Fig.S3. The proliferation of BMSCs after 1, 4, and 7 days of incubation on SCPP/CC<sub>n</sub> (n = 1, 3, 5, 10, 15, or 20). \**p* < 0.05.

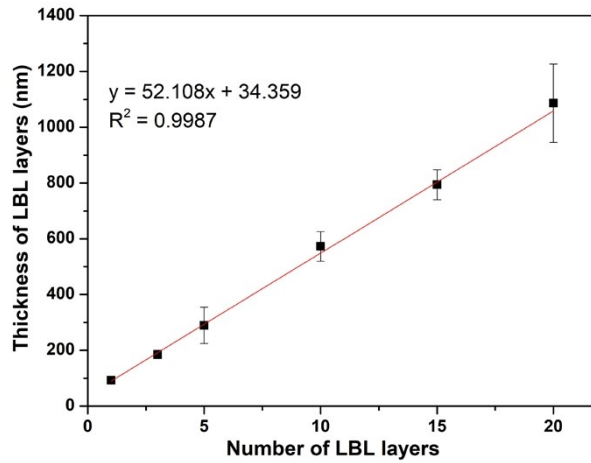

Fig.S4. Fitting diagram of the thickness and number of LBL layers.

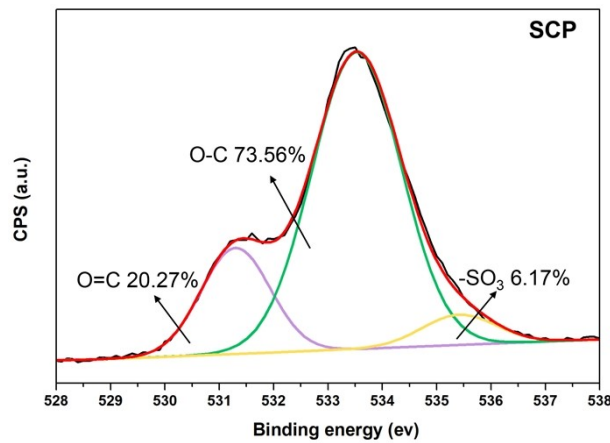

Fig.S5. O1s high-resolution XPS spectra of SCP.

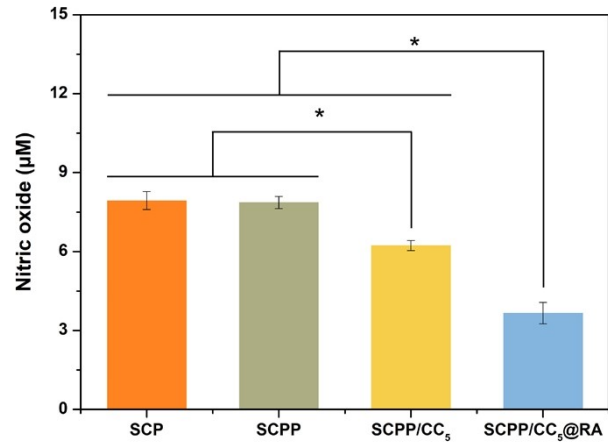

Fig.S6. NO release level of RAW 264.7 cells on various specimens.

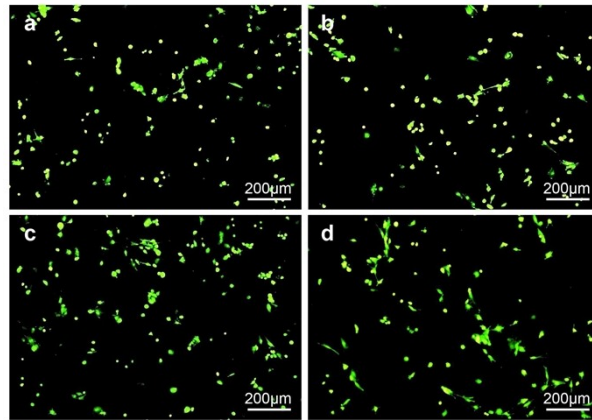

Fig.S7. Live/Dead fluorescent staining images (scale bar = 200 µm) of BMSCs (green represents living cells). (a) SCP, (b) SCPP, (c) SCPP/CC<sub>5</sub>, and (d) SCPP/CC<sub>5</sub>@RA.

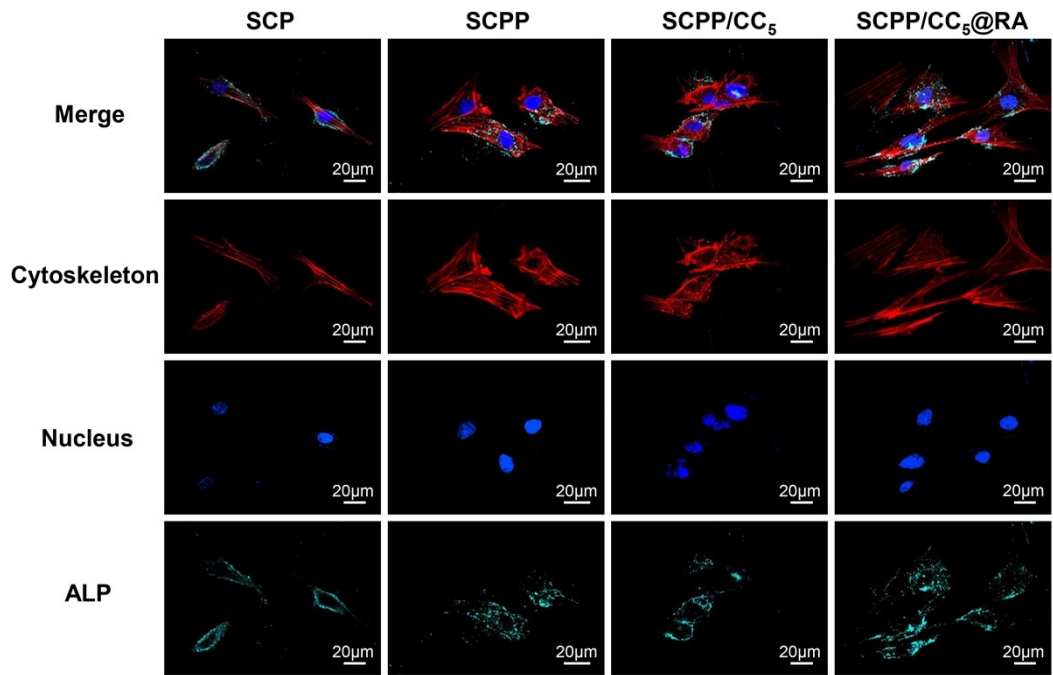

Fig.S8. Representative immunofluorescence staining images (scale bar = 20  $\mu$ m) of ALP after culturing for 7 days on different sample surfaces (cyan: ALP; red: cytoskeleton; blue: nucleus).

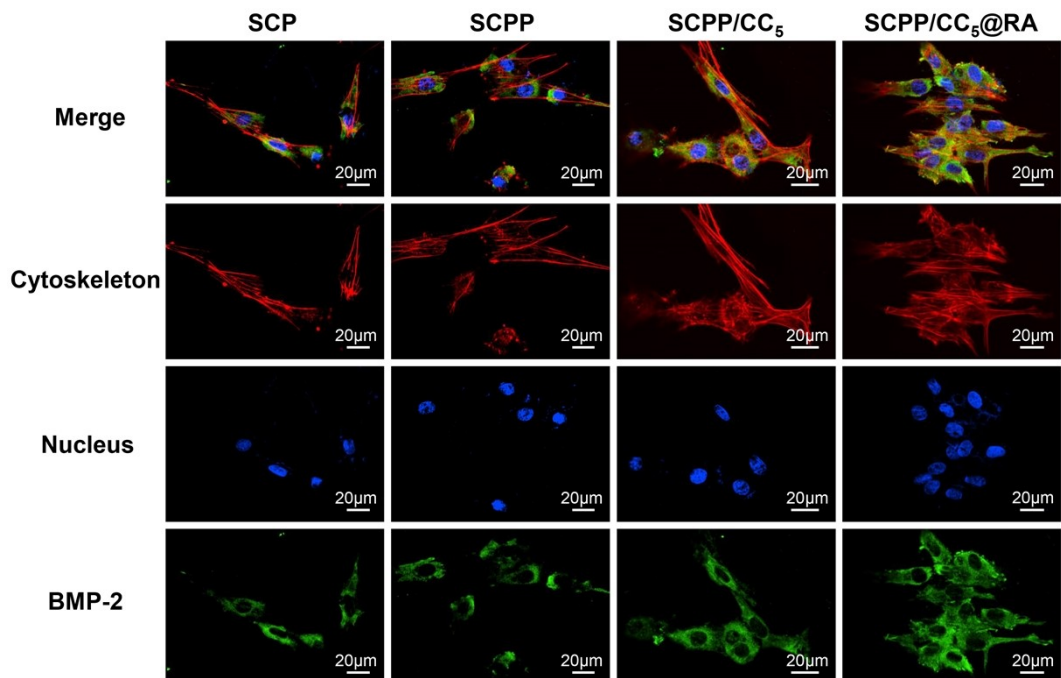

Fig.S9. Representative immunofluorescence staining images (scale bar = 20  $\mu$ m) of BMP-2 after culturing for 7 days on different sample surfaces (green: BMP-2; red:

cytoskeleton; blue: nucleus).

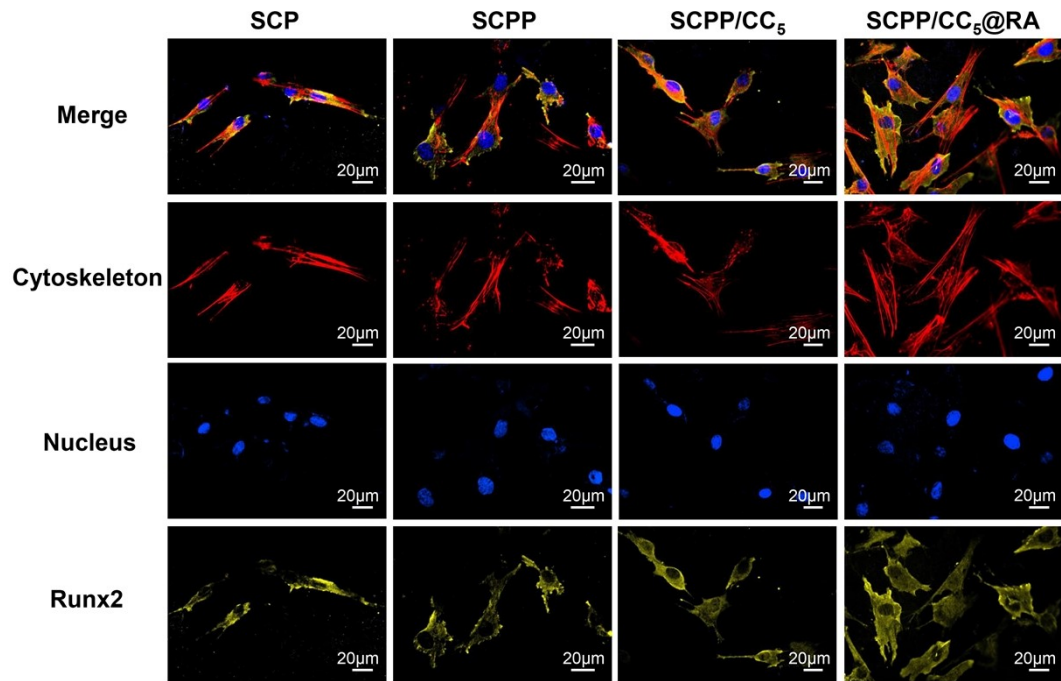

Fig.S10. Representative immunofluorescence staining images (scale bar = 20  $\mu$ m) of

Runx2 after culturing for 7 days on different sample surfaces (yellow: Runx2; red:

cytoskeleton; blue: nucleus).

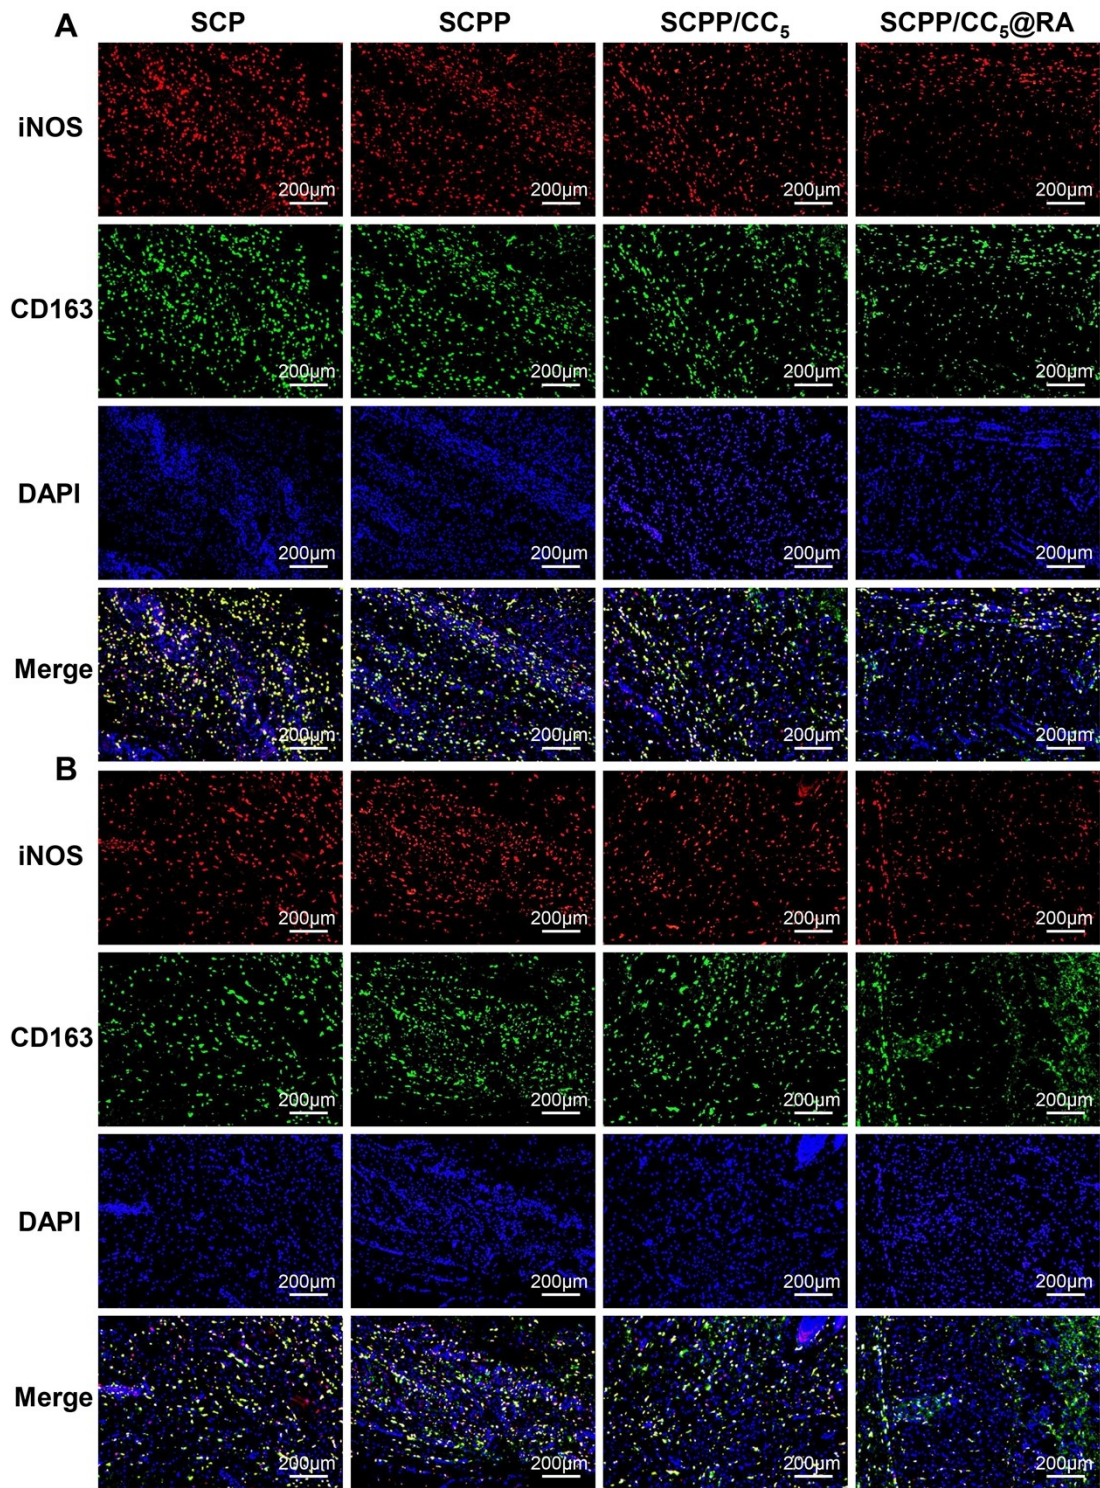

Fig.S11. Immunofluorescence staining images (scale bar = 200  $\mu$ m) of tissues around implants after 3 days (A) and 7 days (B) of implantation. (Red represents iNOS; green represents CD163; blue represents DAPI).

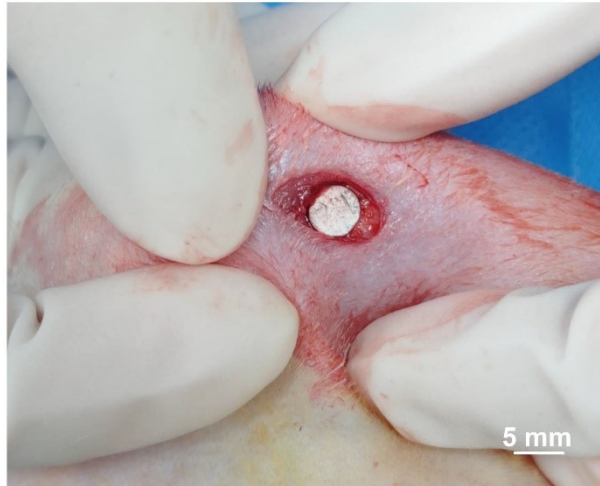

Fig.S12. Development of the rabbit tibial defect model (scale bar = 5 mm).

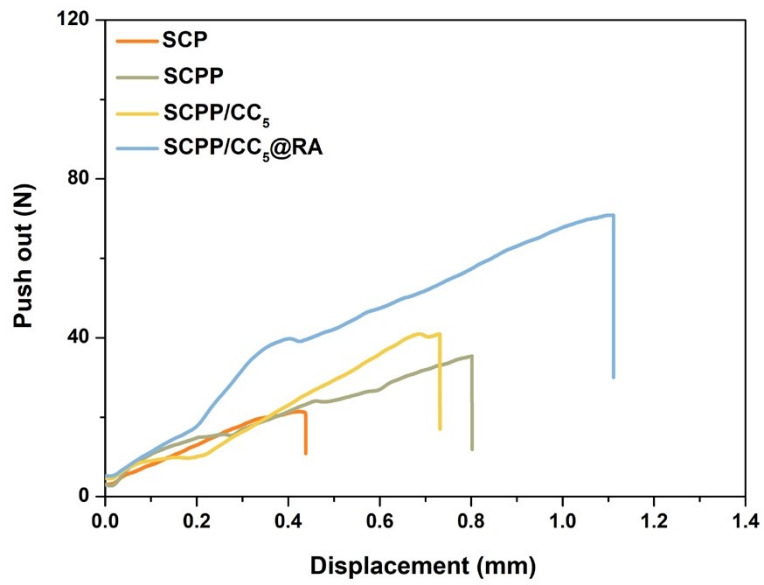

Fig.S13. The load-displacement curves of different implants after 4 weeks of implantation.



**Table S1.** The elemental composition of different sample surfaces determined by XPS.

| Substrate                | C%    | O%    | N%   | S%   |
|--------------------------|-------|-------|------|------|
| SCP                      | 70.40 | 28.89 | —    | 0.72 |
| SCP-OH                   | 70.21 | 29.58 | —    | 0.21 |
| SCPP                     | 66.20 | 31.17 | 2.63 | —    |
| SCPP/CC <sub>5</sub>     | 46.02 | 50.59 | 3.39 | —    |
| SCPP/CC <sub>5</sub> @RA | 41.21 | 55.05 | 3.74 | —    |

**Table S2.** Primer pairs used to measure inflammation-related genes in RT-PCR.

| Genes | Sequence (5'-3')           |
|-------|----------------------------|
| iNOS  | F: CCTTTGCTCATGACATCGACCA  |
|       | R: TCCTGCCCACTGAGTTCGT     |
| IL-6  | F: GACTTCCATCCAGTTGCCTT    |
|       | R: ATGTGTAATTAAGCCTCCGACT  |
| IL-10 | F: GAAGACAATAACTGCACCCACT  |
|       | R: AGTCGGTTAGCAGTATGTTGT   |
| CD206 | F: GTCATACCGTGTTGAACCTCT   |
|       | R: ACACAATCATTCCGTTCCACCAG |
| GAPDH | F: GAACATCATCCCTGCATCCACT  |
|       | R: GATCCACGACGGACACATTGG   |

**Table S3.** Primer pairs used to measure osteogenesis-related genes in RT-PCR.

---

| Genes | Sequence (5'-3')                                      |
|-------|-------------------------------------------------------|
| ALP   | F: ATCGGAACAACCTGACTGACC<br>R: CTGCCTCCTTCCACTAGCAA   |
| BMP-2 | F: ATTAGCAGGTCTTTGCACCA<br>R: ACGCTTTTCTCGTTTGTGGA    |
| Col-1 | F: ATGCCATCAAGGTCTACTGCAA<br>R: GAACCTTCGCTTCCATACTCG |
| Runx2 | F: GGCAGCACGCTATTAAATCCAA<br>R: GACTCATCCATTCTGCCGCTA |
| GAPDH | F: TATGACTCTACCCACGGCAAG<br>R: AACTCAGCACCAGCATCACC   |

---
